# Supplementary material for: Ag Nanoparticles Stabilized on Cyclodextrin Polymer Decorated with Multi-Nitrogen Atom Containing Polymer: An Efficient Catalyst for the Synthesis of Xanthenes
Source: MDPI journal article supplement (doi:10.3390/molecules25020241), 2020-01-07
Supplement: s1 [file s1]

## Supporting information

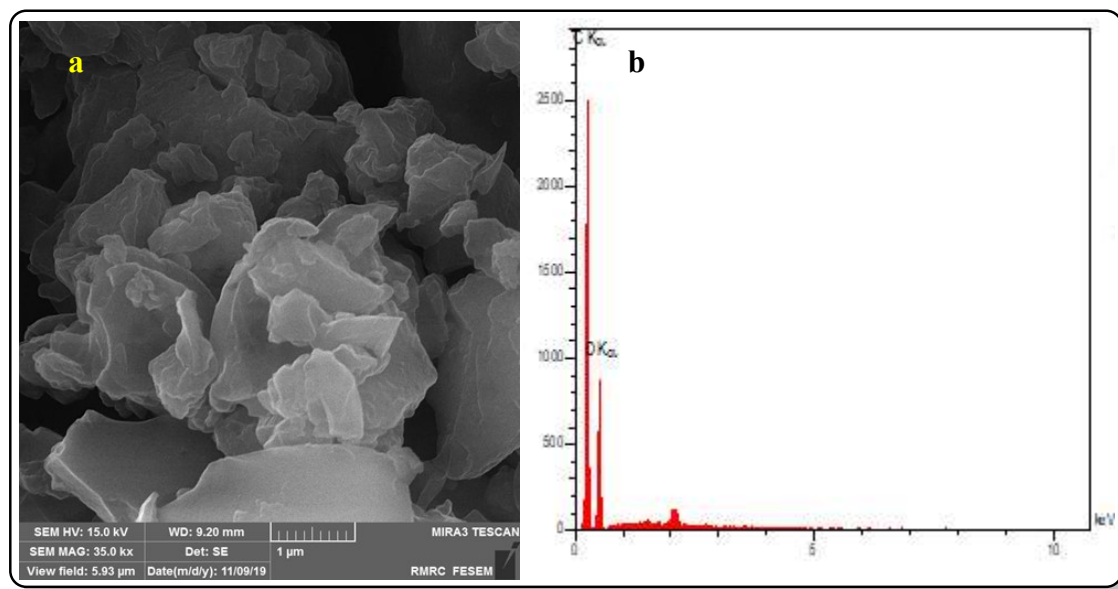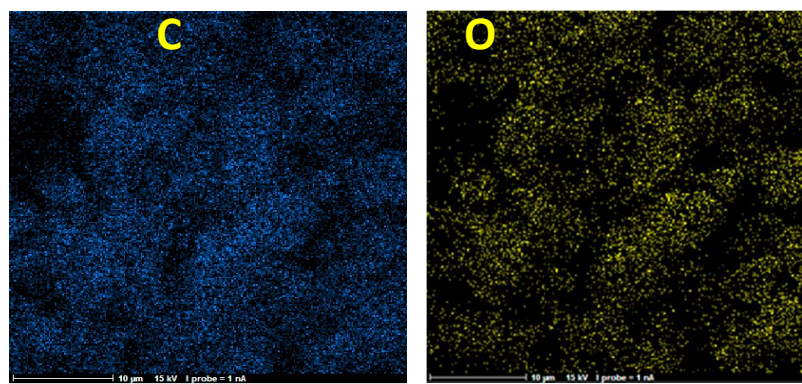

(c)

**Figure S1.** SEM image (a), EDS analysis (b) and Elemental mapping analysis (c) of CDNS.

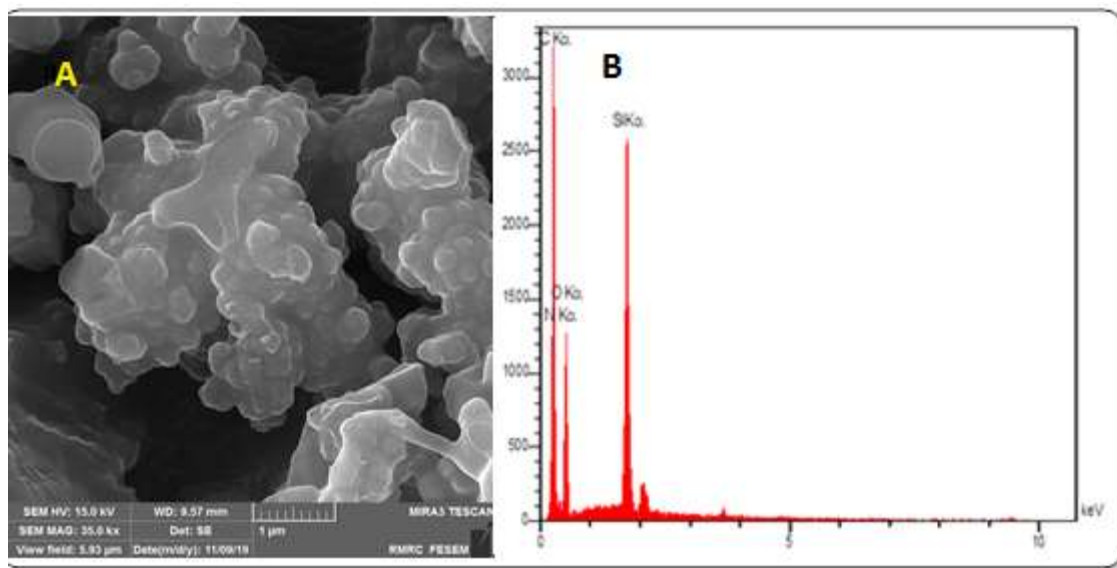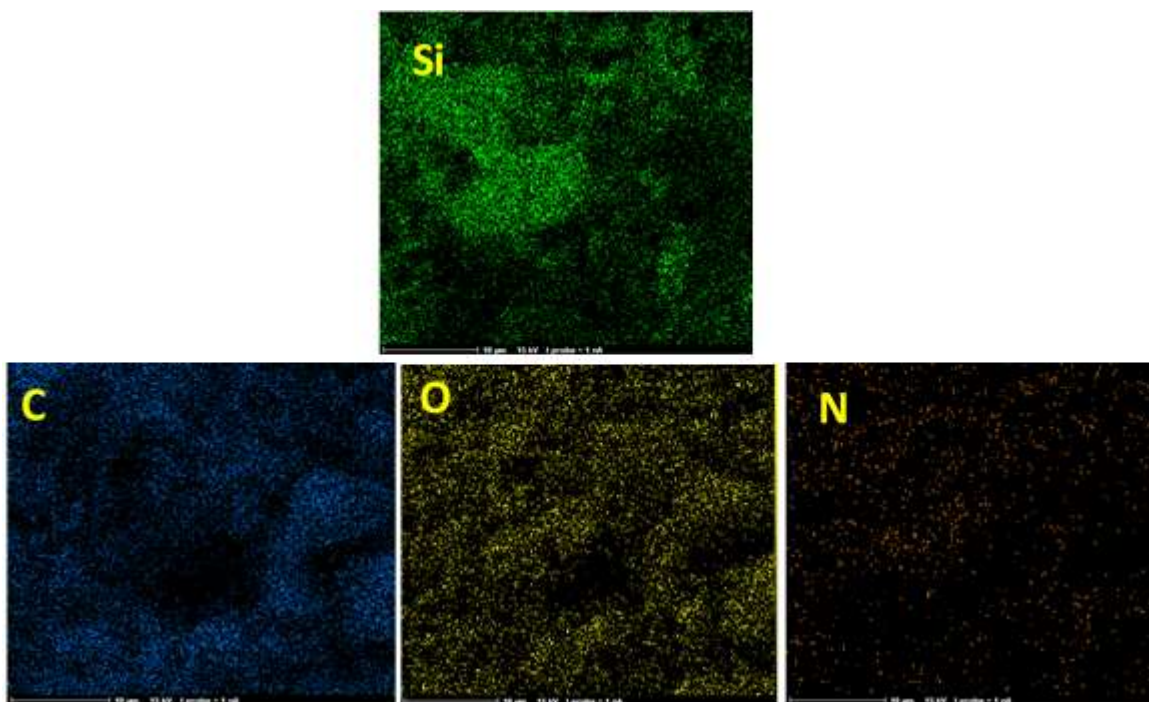

C

**Figure S2.** SEM image (a), EDS analysis (b) and Elemental mapping analysis (c) of CDNS-N.

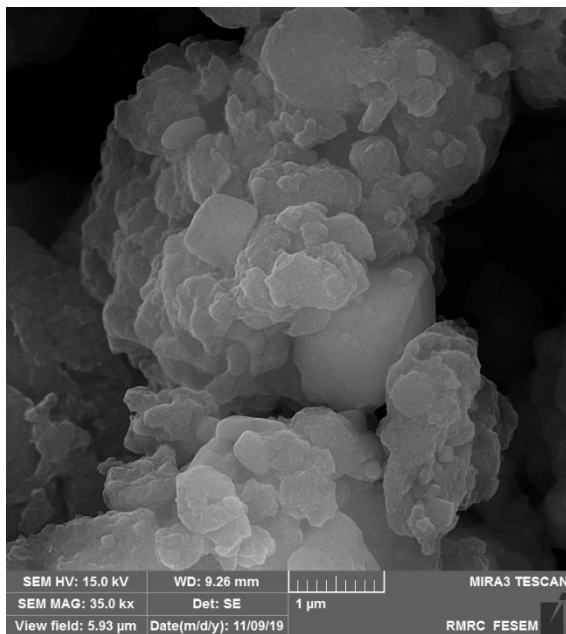

A

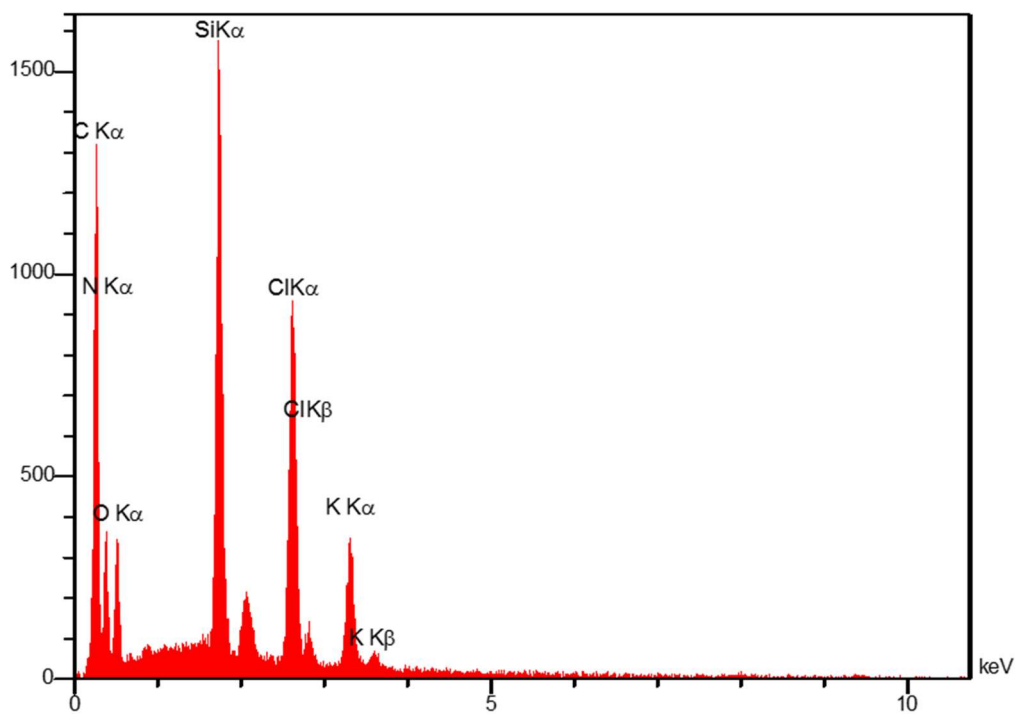

B

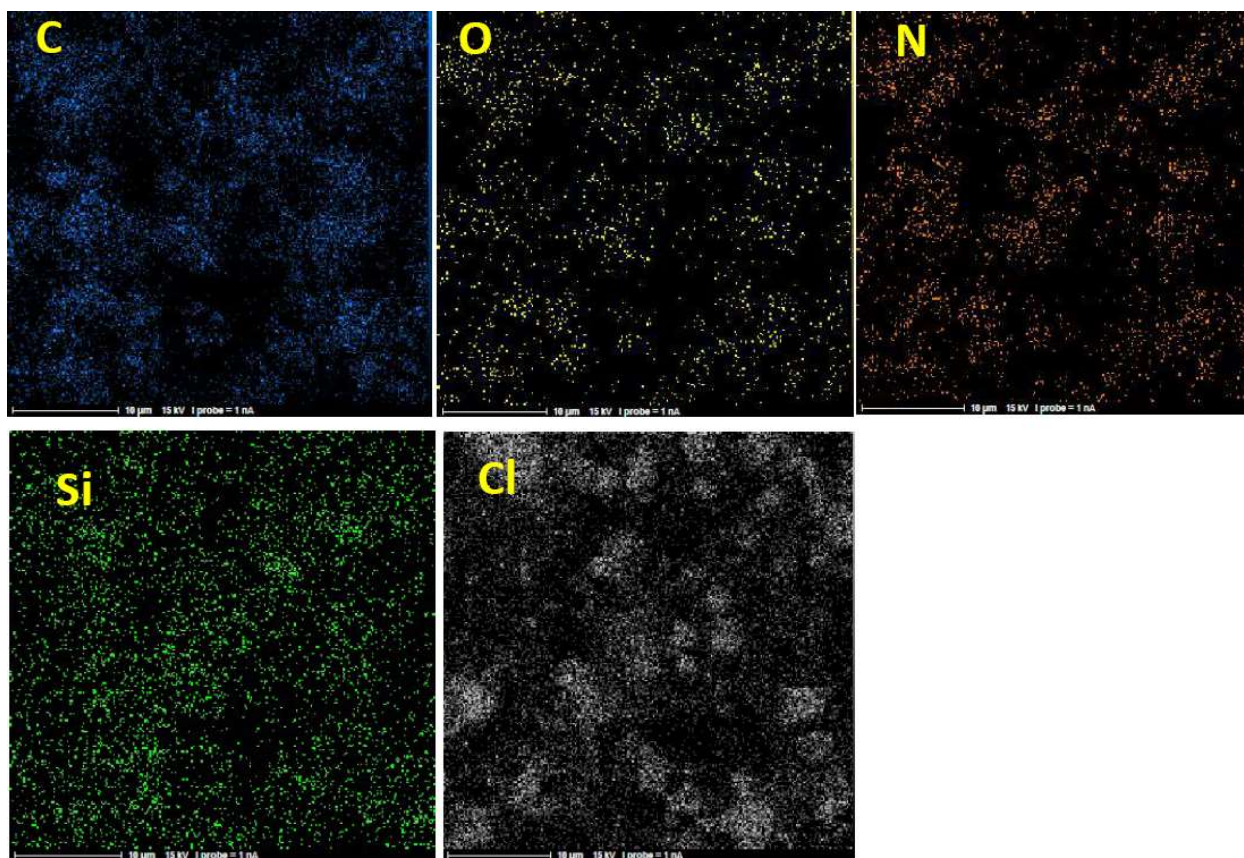

**Figure S3.** SEM image (A), and Elemental mapping analysis (B) of CDNS-N/PMelamine
